# Supplementary material for: The Class III PI3K/Beclin-1 Autophagic Pathway Participates in the mmLDL-Induced Upregulation of ETA Receptor in Mouse Mesenteric Arteries
Source: Adv Pharmacol Pharm Sci. 2020 Apr 1;2020:5070436. doi: 10.1155/2020/5070436 (PMC7152935; doi:10.1155/2020/5070436)
Supplement: Supplementary Materials — Supplementary File 1: inhibitory effect of 3-MA on the mmLDL-induced upregulated expression of the ETA receptor. Supplementary File 2: inhibitory effect of 3-MA on the mmLDL-induced effects on Class III PI3K, Beclin-1, LC3 II/I, and p62 proteins. Supplementary File 3: inhibitory effect of 3-MA on the mmLDL-induced effect on p-NF-κB protein. [file 5070436.f1.xlsx]

## Sheet: data
Figure 1
A																				B				C
X title	mmLDL			mmLDL+5mg/kg 3-MA			mmLDL+15mg/kg 3-MA			mmLDL+25mg/kg 3-MA			NS			LDL				mmLDL	mmLDL+15mg/kg 3-MA	NS		mmLDL	mmLDL+15mg/kg 3-MA	NS
	mean	SEM	n	mean	SEM	n	mean	SEM	n	mean	SEM	n	mean	SEM	n	mean	SEM	n		2.08	1.42	1.15		0.31	0.21	0.14
-11	0	0	8	0	0	8	0	0	8	0	0	8	0	0	8	0	0	8		2.32	1.19	1.04		0.33	0.24	0.17
-10.52	0	0	8	0	0	8	0	0	8	0	0	8	0	0	8	0	0	8		2.1	1.3	0.96		0.3	0.2	0.13
-10	0.09 (P > 0.999)	0.09	8	0.99	0.49	8	0.06 (P > 0.999)	0.06	8	0.24	0.14	8	0	0	8	0	0	8		1.98	1.21	0.97		0.33	0.2	0.12
-9.52	0.87 (P > 0.999)	0.34	8	3.15	1.46	8	0	0	8	1.32	0.52	8	0.16	0.11	8	0.16	0.12	8		1.96	1.38	1.06
-9	15.49 (P = 0.9980)	0.76	8	8.1	3.19	8	5.06 (P = 0.9966)	4.36	8	2.94	1.01	8	6.22	1.4	8	6.22	1.42	8		2.27	1.19	1.18
-8.52	113.45 (P = 0.0552)	23.33	8	86.04	26.53	8	93.84 (P = 0.9407)	11.26	8	63.08	17.14	8	53.29	8.48	8	55.29	8.5	8
-8	284.4*** (P < 0.0001)	16.81	8	258.05	29.48	8	209.6 ## (P = 0.0065)	20.21	8	187.11	19.4	8	169.19	14.76	8	175.19	14.82	8
-7.52	342.31*** (P < 0.0001)	29.29	8	314	33.5	8	238.85### (P < 0.0001)	25.13	8	218.44	23.78	8	196.44	15.43	8	205.54	15.49	8
-7	346.16*** (P < 0.0001)	29.46	8	316.59	33.63	8	242.85### (P < 0.0001)	27.25	8	224.07	24.23	8	201.58	16.63	8	210.58	16.7	8
Figure 2
A				B				C				D
mmLDL	mmLDL+15mg/kg 3-MA	NS		mmLDL	mmLDL+15mg/kg 3-MA	NS		mmLDL	mmLDL+15mg/kg 3-MA	NS		mmLDL	mmLDL+15mg/kg 3-MA	NS
1.09	0.93	0.84		4.26	1.7	1.4		1.35	0.68	0.88		1.35	2.17	3.37
1.13	0.89	0.76		4.26	2.86	2.36		1.43	0.72	0.83		1.05	2.36	3.58
1.26	0.76	0.7		3.69	2.85	1.75		1.28	0.6	0.73		1.14	2.65	3.44
1.22	0.78	0.71		3.83	2.01	1.63		1.24	0.61	0.77		1.39	2.59	3.01
Figure 3
A				B
mmLDL	mmLDL+15mg/kg 3-MA	NS		mmLDL	mmLDL+15mg/kg 3-MA	NS
0.41	0.14	0.12		0.14	0.14	0.16
0.37	0.18	0.14		0.15	0.14	0.14
0.45	0.18	0.16		0.16	0.16	0.14
0.41	0.16	0.14		0.18	0.15	0.16
